# Supplementary material for: Niche partitioning by sympatric civets in the Himalayan foothills of Pakistan
Source: PeerJ. 2023 Feb 21;11:e14741. doi: 10.7717/peerj.14741 (PMC9951805; doi:10.7717/peerj.14741)
Supplement: Supplemental Information 2 [file peerj-11-14741-s002.xlsx]

## Sheet: Table 1
	Table 1: Diversity, Richness and Evenness of Prey Species in Diet of Small Indian Civet.
Species	Frequency of Occurrence of Prey Species in diet of Small Indian Civet	pi	Lnpi	Pi*LnPi
Indian Gerbil (Tatera indica)	7	0.112903	-2.18122	-0.246267
House mouse (Mus musculus)	3	0.0483871	-3.02852	-0.146541
Norway rat (Rattus norvegicus)	2	0.0322581	-3.43399	-0.110774
Roof or house rat (Rattus rattus)	1	0.016129	-4.12713	-0.0665667
Himalayan bulbul (Pycnonotus leucogenys)	2	0.0322581	-3.43399	-0.110774
House sparrow (Passer domesticus)	1	0.016129	-4.12713	-0.0665667
Poultry (Gallus gallus domesticus)	9	0.145161	-1.92991	-0.280148
Insects (Orthoptera) Grasshopper	2	0.0322581	-3.43399	-0.110774
Amphibians	1	0.016129	-4.12713	-0.0665667
Wild Himalayan pear (Dhandali) Pyrus pashia	15	0.241935	-1.41908	-0.343327
Aakhray	5	0.0806452	-2.5177	-0.20304
Apple Pyrus malus	3	0.0483871	-3.02852	-0.146541
Kov Olea ferruginea	2	0.0322581	-3.43399	-0.110774
Choti bairi Ziziphus oxyphylla	2	0.0322581	-3.43399	-0.110774
Water melon Citrullus lanatus	1	0.016129	-4.12713	-0.0665667
Maluk Diospyros lotus	1	0.016129	-4.12713	-0.0665667
Loquat Eriobotrya japonica	3	0.0483871	-3.02852	-0.146541
Grits	1	0.016129	-4.12713	-0.0665667
Anthropogenic	1	0.016129	-4.12713	-0.0665667
			Diversity	-2.53224
			Richness	19
			Log spp richness	2.94444
			Evenness	-0.860008

## Sheet: Table 2
Table 2: Number of prey species recovered from each scat sample of small Indian Civet
Sample No.	Number of prey species recovered
1	2
2	2
3	1
4	1
5	3
6	1
7	1
8	1
9	2
10	1
11	2
12	1
13	2
14	2
15	1
16	2
17	1
18	1
19	1
20	1
21	2
22	1
23	1
24	2
25	2
26	1
27	2
28	1
29	2
30	1
31	2
32	1
33	1
34	2
35	1
36	2
37	2
38	1
39	1
40	1
41	2
42	1
43	1
44	2

## Sheet: Table 3
	Table 3: Diversity, Richness and Evenness of Prey Species in Diet of Asian palm civet
Species	Frequency of Occurrence of Prey Species in diet of Asian Palm civet	pi	LN pi	pi*Lnpi
House mouse (Mus musculus)	19	0.0984456	-2.31825	-0.228222
Indian Gerbil (Tatera indica)	7	0.0362694	-3.31678	-0.120298
Roof or house rat (Rattus rattus)	6	0.0310881	-3.47093	-0.107905
Norway rat	4	0.0207254	-3.8764	-0.0803398
Rhesus Monkey	5	0.0259067	-3.65325	-0.0946438
Desert hare (Lepus nigricollis dayanus)	8	0.0414508	-3.18325	-0.131948
Domestic cow	7	0.0362694	-3.31678	-0.120298
Domestic sheep	7	0.0362694	-3.31678	-0.120298
Snail	2	0.0103627	-4.56954	-0.0473528
Insects (Orthoptera) Grasshopper	7	0.0362694	-3.31678	-0.120298
Insects (Coleoptera beetle)	1	0.00518135	-5.26269	-0.0272678
Hen (Poultry)	13	0.0673575	-2.69774	-0.181713
Bara bair	4	0.0207254	-3.8764	-0.0803398
AAkharay	11	0.0569948	-2.86479	-0.163278
Dandali	53	0.274611	-1.2924	-0.354907
Choti bairi	10	0.0518135	-2.96011	-0.153373
Kov Olea	6	0.0310881	-3.47093	-0.107905
Kumlo	1	0.00518135	-5.26269	-0.0272678
Long grass under pinus	2	0.0103627	-4.56954	-0.0473528
Apple	2	0.0103627	-4.56954	-0.0473528
Orange	1	0.00518135	-5.26269	-0.0272678
Khobani	2	0.0103627	-4.56954	-0.0473528
Maluk	4	0.0207254	-3.8764	-0.0803398
Wild fig	2	0.0103627	-4.56954	-0.0473528
Tarbooz	2	0.0103627	-4.56954	-0.0473528
Dhania	2	0.0103627	-4.56954	-0.0473528
Wheat	1	0.00518135	-5.26269	-0.0272678
Grits	3	0.015544	-4.16408	-0.0647266
Anthropogenic	1	0.00518135	-5.26269	-0.0272678
			Diversity	-2.77864
			richness	29
			Log spp ricness	3.3673
			Eveness	-0.825185

## Sheet: Table 4
Table 4: Number of prey species recovered from each scat sample of Asian Palm civet
Sample No.	No. of prey species recovered from scats
1	3
2	1
3	1
4	1
5	1
6	4
7	2
8	2
9	2
10	1
11	2
12	1
13	2
14	1
15	1
16	1
17	1
18	2
19	2
20	4
21	2
22	1
23	2
24	1
25	1
26	1
27	1
28	1
29	1
30	1
31	1
32	1
33	3
34	1
35	1
36	1
37	2
38	2
39	4
40	4
41	1
42	1
43	2
44	2
45	1
46	2
47	1
48	1
49	1
50	4
51	2
52	2
53	1
54	1
55	1
56	1
57	2
58	2
59	3
60	1
61	2
62	1
63	1
64	1
65	1
66	2
67	2
68	1
69	2
70	1
71	1
72	2
73	2
74	2
75	2
76	1
77	4
78	2
79	3
80	3
81	5
82	4
83	2
84	1
85	3
86	2
87	2
88	1
89	1
90	2
91	3
92	3
93	2
94	1
95	2
96	1
97	2
98	2
99	1
100	1
101	1
102	2
103	2
104	2
105	1
106	2
107	3
108	1
